# Supplementary figures and images for: Distractions in the cardiac catheterisation laboratory: impact for cardiologists and patient safety
Source: HighWire-hosted journal article supplement (doi:10.1136/openhrt-2020-001260), 2020-12-01

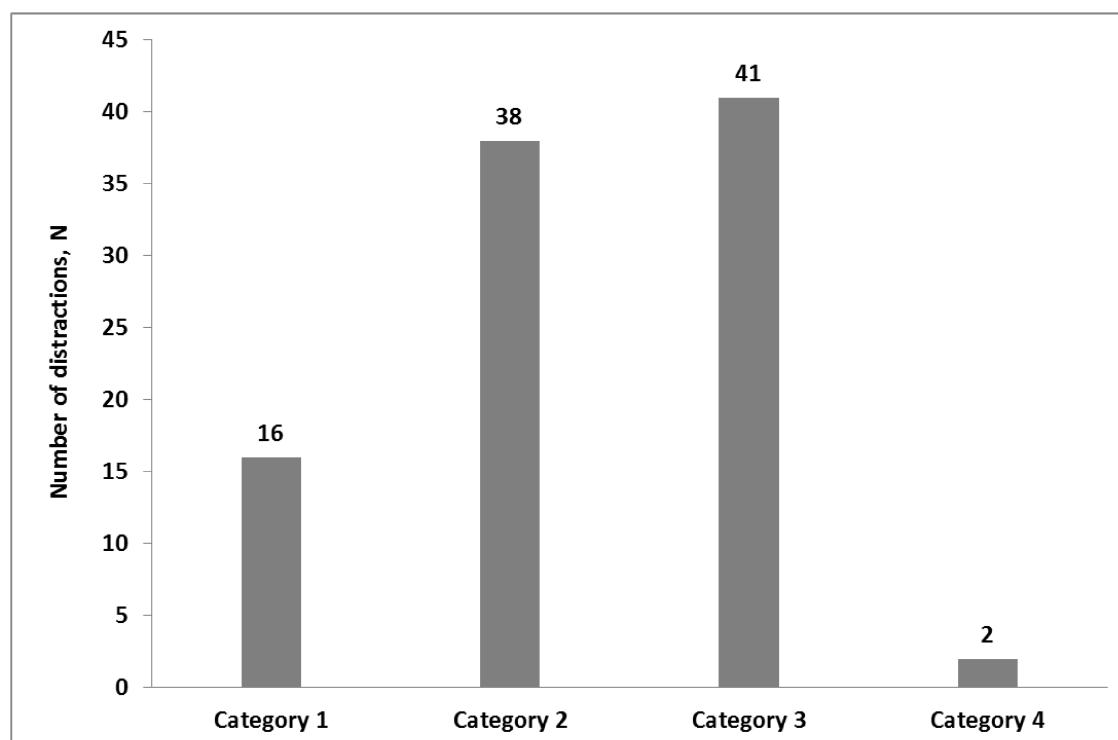

**Online figure 3.** Distractions (n) by procedural risk categories.

Supplement: openhrt-2020-001260supp003_data_supplement.pdf [file openhrt-2020-001260supp003_data_supplement.pdf]
